# Supplementary material for: Cofacial porphyrin multilayers via layer-by-layer assembly
Source: Royal Society of Chemistry journal article supplement (doi:10.1039/b512084e), 2005-11-14
Supplement: b512084e.pdf [file b512084e.pdf]

## Supplementary data

### Cofacial Porphyrin Multilayers via Layer-by-Layer Assembly

Dong-Chan Lee,<sup>a</sup> Gustavo M. Morales, Youngu Lee, and Luping Yu\*

Department of Chemistry and James Franck Institute, The University of Chicago, Chicago, Illinois 60637, USA. Fax: (+1) 773 702 0805, Tel : (+1) 773 702 8698,  
E-mail: lupingyu@midwayuchicago.edu

<sup>a</sup> Present Address: Department of Chemistry, University of Nevada Las Vegas, 4505 Maryland Parkway, Box 454003, Las Vegas, Nevada 89154-4003

#### Procedures for the assembly of Si-TPP multilayers

Glass and ITO substrates were treated to generate surface hydroxides as follows; glass substrates were sonicated in 5 wt% KOH for 3 h. The glass substrates were then rinsed with deionized water by sonication for 30 min for three times. In the case of ITOs, they were dipped in NH<sub>4</sub>OH / H<sub>2</sub>O<sub>2</sub> / H<sub>2</sub>O (1 / 1 / 5) for 6 h at 80 °C followed by rinsing with DI water. All the substrates were rinsed with absolute EtOH and dried by a stream of N<sub>2</sub>, and then dried under vacuum. The assembly of Si-TPP multilayers was conducted in a glove box. First, substrates were dipped in a solution of TPP-SiCl<sub>2</sub> / CH<sub>2</sub>Cl<sub>2</sub> (concentration: ca. 1 mg / mL) for 30 min and washed with CH<sub>2</sub>Cl<sub>2</sub> for 10 min. Then the films were removed from the glove box. Subsequently, the films were dipped in deionized water for 5 min followed by drying over P<sub>2</sub>O<sub>5</sub> under vacuum for 2 hrs. Multilayers of porphyrin with siloxane linkage were obtained by the repetition of the dipping cycle.

#### Instrumentation

**Cyclic Voltammetry** All the glassware were cleaned using a mixture of H<sub>2</sub>SO<sub>4</sub> / H<sub>2</sub>O<sub>2</sub> (7 / 1) at 90 °C. Then they were rinsed with deionized water and dried in an oven. Cyclic voltammetry (CV) was performed using a CV-50W Voltammetric Analyzer (Bioanalytical Systems Inc.) in a conventional one compartment three-electrode cell. The reference electrode was prepared in a glass tube with a porous Vycor tip as a junction (Bioanalytical Systems Inc.). The potentials were reported against an Ag/AgCl wire immersed in 0.1 M tetrabutylammonium hexafluorophosphate (TBAPF<sub>6</sub>) in CH<sub>2</sub>Cl<sub>2</sub>. A platinum wire was used as an auxiliary electrode. Electrochemical grade TBAPF<sub>6</sub> (Fluka) in extra dry CH<sub>2</sub>Cl<sub>2</sub>

(Acros) was used as a supporting electrolyte. The electrolyte solutions were degassed with argon prior to each experiment. All the measurements were carried out under ambient conditions.

**Atomic Force Microscopy** The tapping mode AFM imaging of the sample was performed under ambient conditions with a nanoscope IIIA multimode scanning probe microscope (Digital Instrument, Santa Barbara, CA) equipped with a E type scanner (Digital Instrument). A rectangular silicon probe and a 125  $\mu\text{m}$  long cantilever comprising a lever force constant of 40 N/m and resonant frequency of about 320 kHz (Digital Instrument) were utilized. All the AFM images were acquired with typical scan rates of 0.5-1.0 Hz and a frame rate of 512.

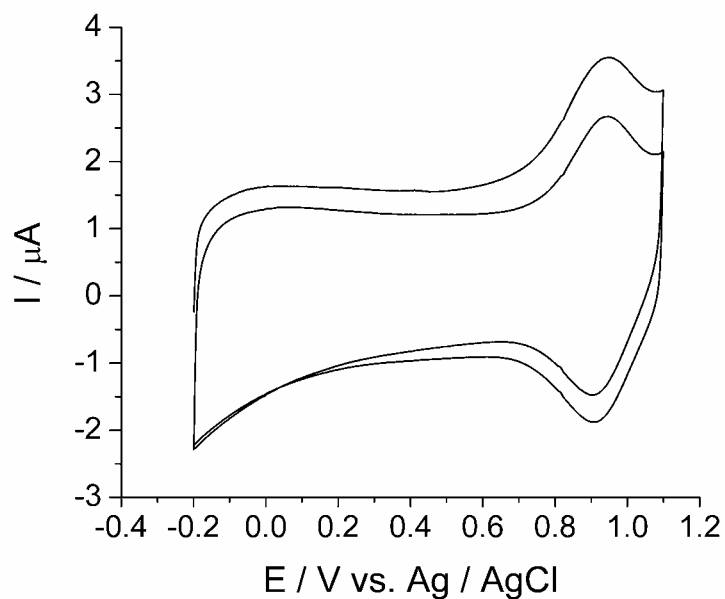

Figure S1. Reversibility of the first oxidation of reduction processes of Si-TPP monolayer under 2 scans at a potential range between -0.2 V and 1.1 V.

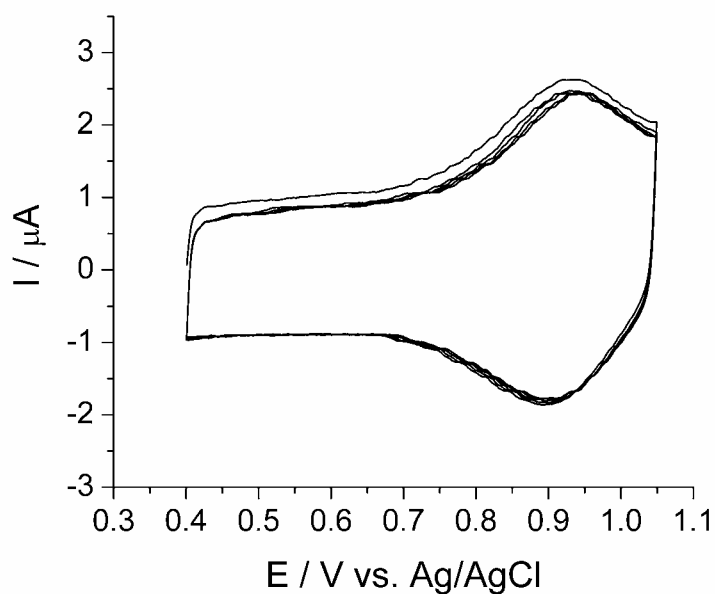

Figure S2. Reversibility of the first oxidation of reduction processes of Si-TPP monolayer under 4 scans at a potential range between 0.4 V and 1.05 V.

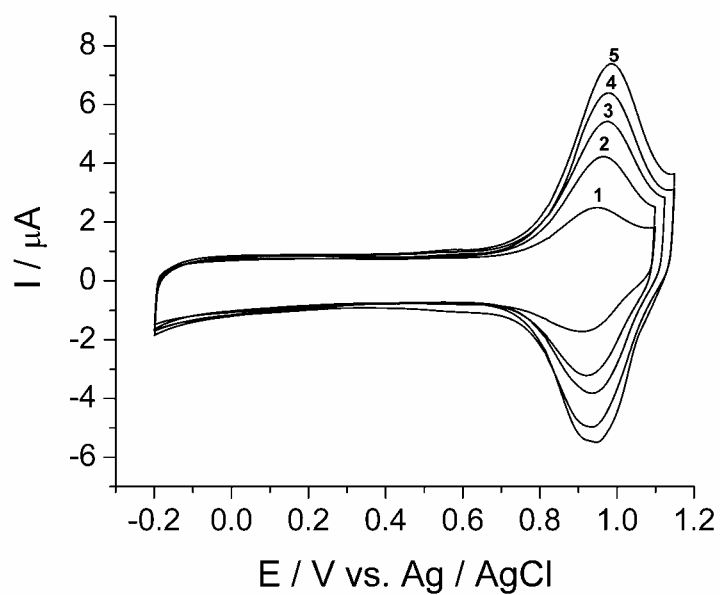

Figure S3. Electrochemical responses of porphyrin multiplayer by the number of layers. Numbers on curves indicate the number of porphyrin layers.

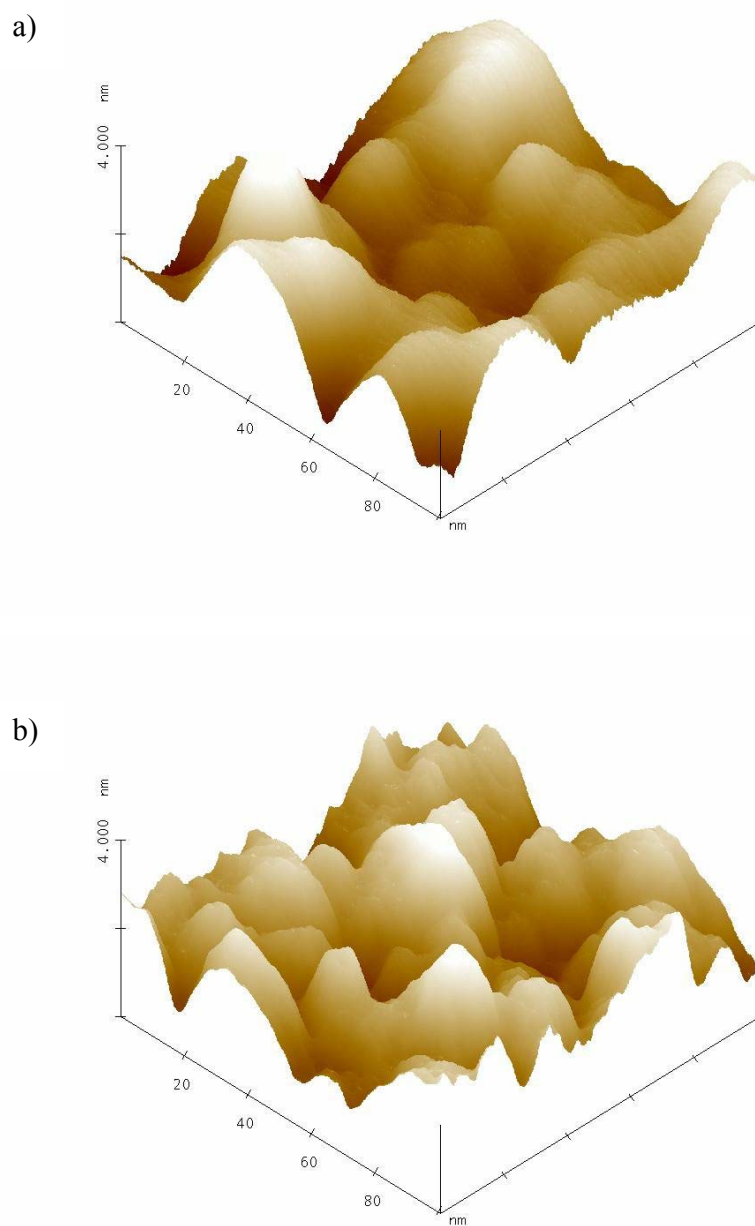

Figure S4. Tapping mode AFM images of: a) glass substrate; b) 10 layers of porphyrin multilayers on glass substrate.
